# Supplementary material for: High Sensitivity of Aged Mice to Deoxynivalenol (Vomitoxin)-Induced Anorexia Corresponds to Elevated Proinflammatory Cytokine and Satiety Hormone Responses
Source: PubMed Central journal article supplement (PMC4626729; doi:10.3390/toxins7104199), 2015-10-19
Supplement: toxins-07-04199-s001.pdf [file toxins-07-04199-s001.pdf]

## Supplementary Materials

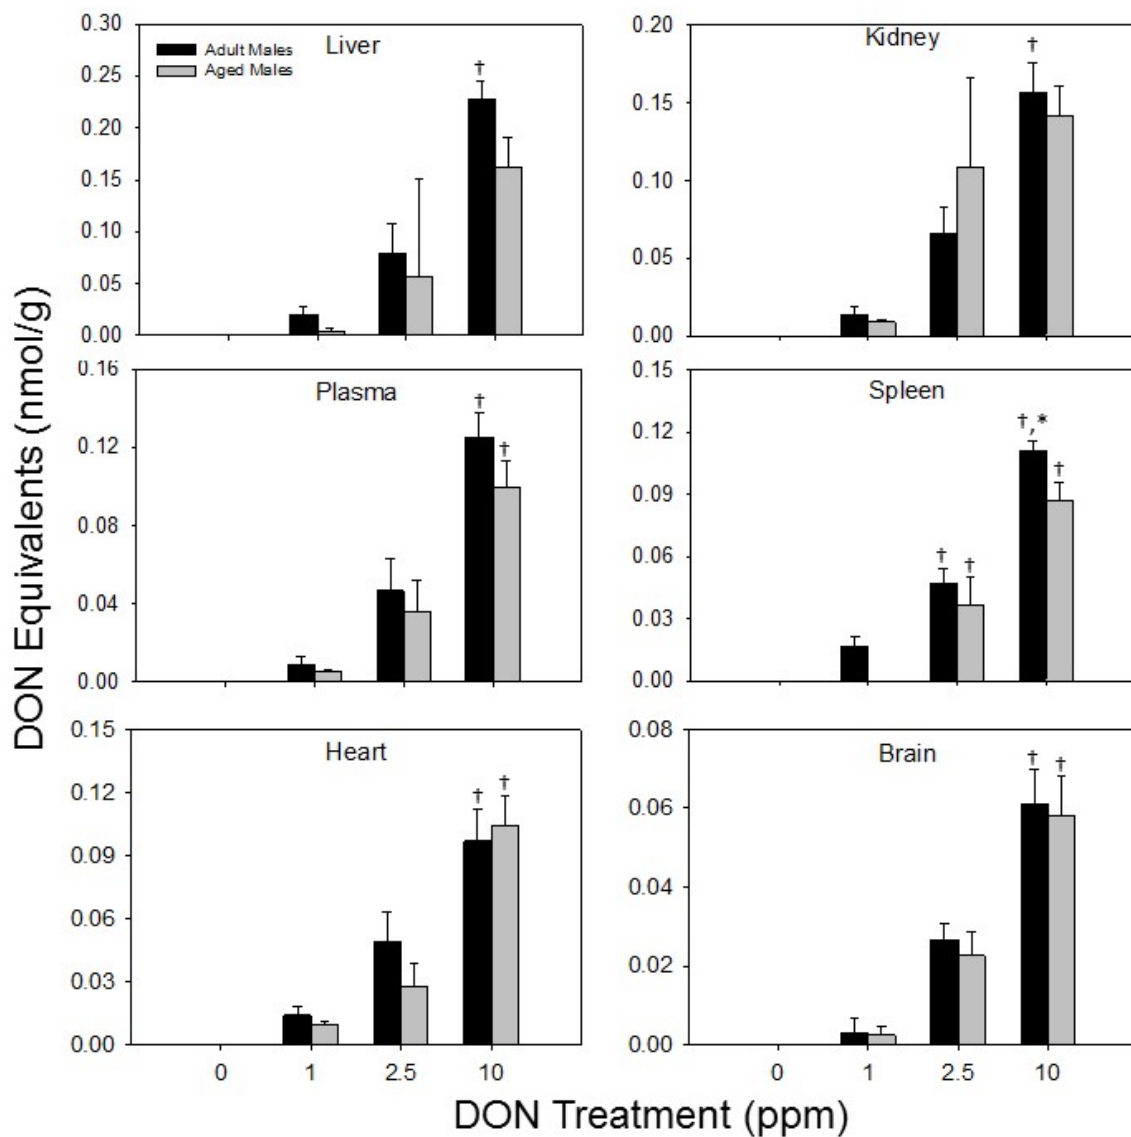

**Figure S1.** Tissue DON concentrations increase in a dose dependently after dietary DON exposure in mice. Data are mean  $\pm$  SEM ( $n = 6/\text{gp}$ ). Asterisk indicates statistical significance from aged mice on same treatment diet and dagger indicates significance from control diet within age group ( $p < 0.05$ ).
